# Supplementary material for: A Novel Colorimetric Immunoassay Utilizing the Peroxidase Mimicking Activity of Magnetic Nanoparticles
Source: PubMed Central journal article supplement (PMC3676825; doi:10.3390/ijms14059999), 2013-05-10

## Supplementary Information

**Figure S1.** TEM images of non-functionalized MNPs (A) and amine-modified MNPs (B), and particle size distribution analysis by measuring dynamic light scattering of non-functionalized MNPs (C) and amine-modified MNPs (D), (scale bar in TEM images = 10 nm).

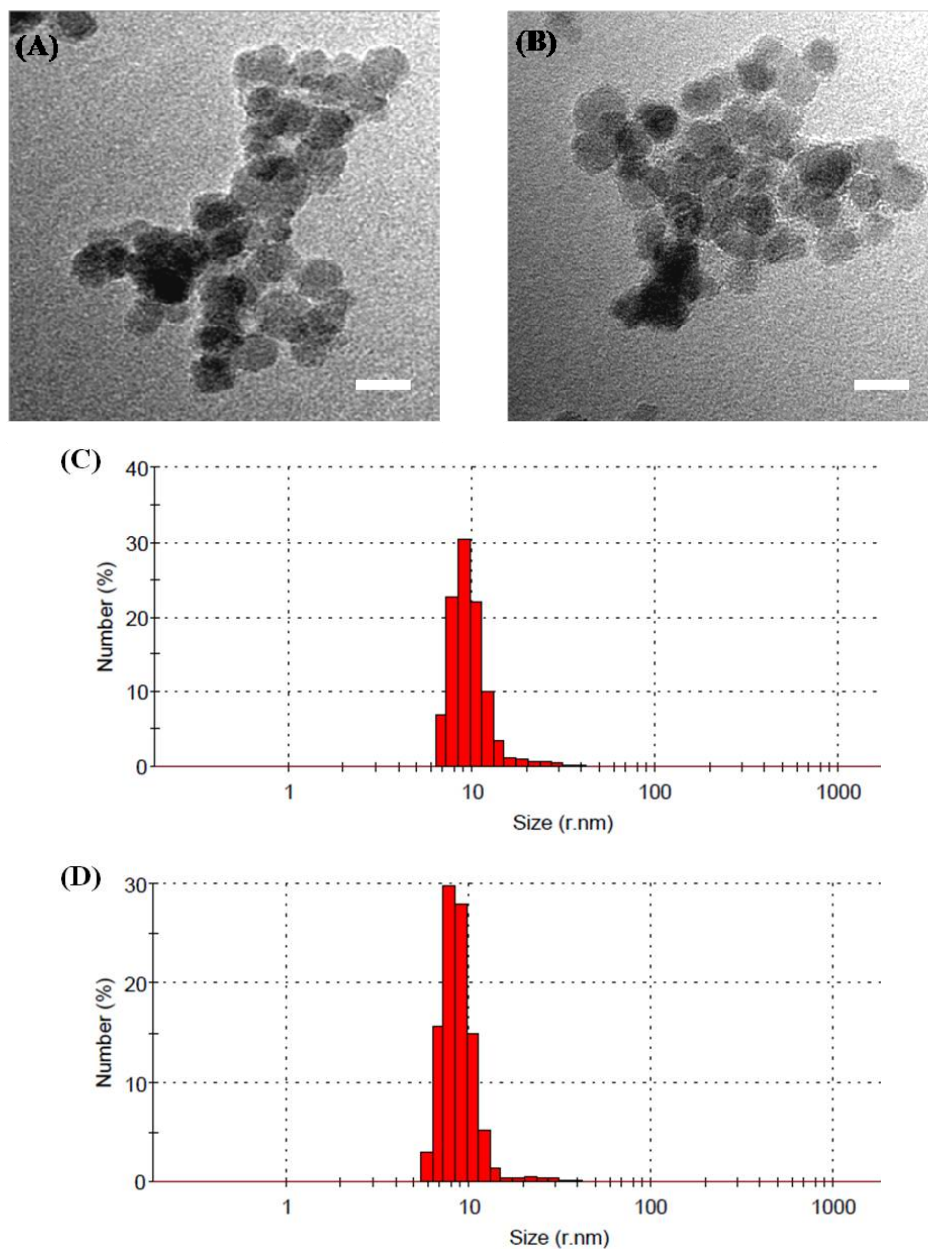

**Figure S2.** Photographs of color signal generation arising from MNPs-induced colorimetric reaction of TMB with and without  $H_2O_2$ . (A) w/o MNPs, (B) with bare MNPs, (C) with amine-modified MNPs, (D) with glutaraldehyde-functionalized MNPs, and (E) with antibody-conjugated MNPs. The particle concentration per well was  $100 \mu\text{g/mL}$ .

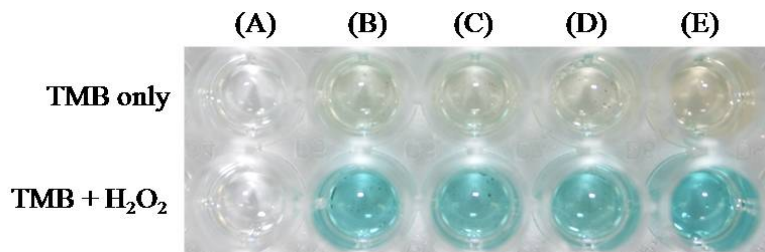

**Figure S3.** Steady-state kinetic assays of bare MNPs and MNP-Abs for TMB substrate (A), and their double reciprocal (Lineweaver-Burk) plots of activity (B). The y-axis values are obtained from the observed absorbance values at 650 nm wavelength.

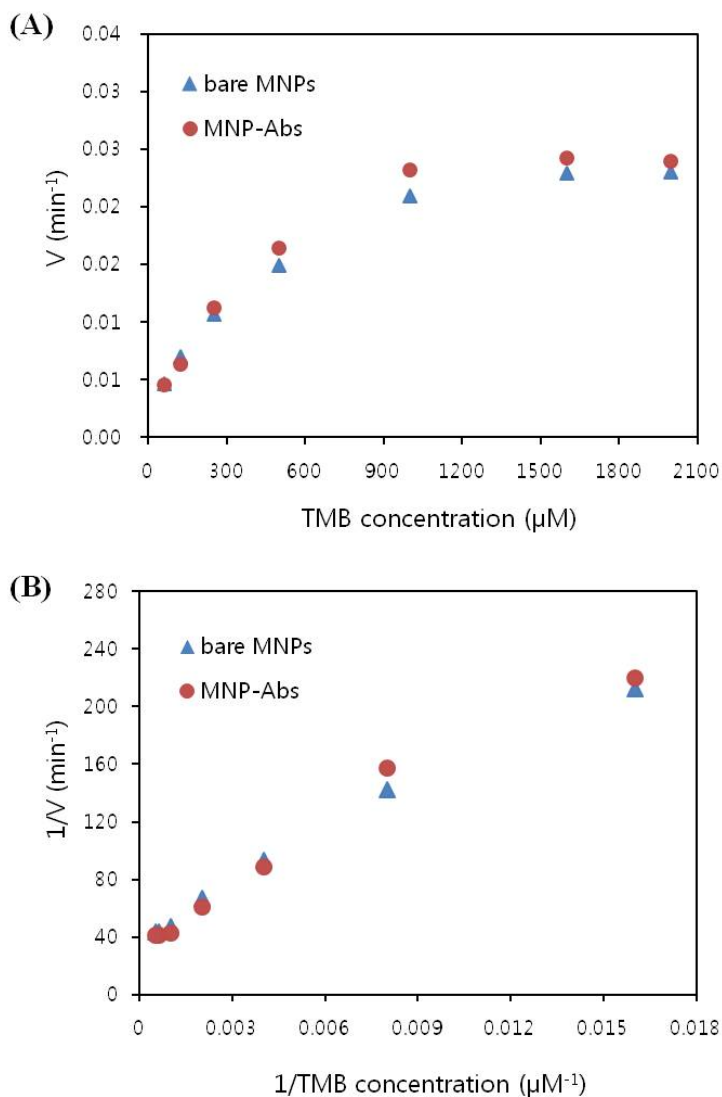

**Table S1.** Comparison of kinetic constants of bare MNPs and MNP-Abs.  $K_m$  is the Michaelis constant and  $V_{max}$  is the maximal reaction velocity.

|           | $K_m$ [mM] | $V_{max}$ [ $\mu\text{Ms}^{-1}$ ] |
|-----------|------------|-----------------------------------|
| bare MNPs | 0.267      | 0.3003                            |
| MNP-Abs   | 0.321      | 0.3323                            |

**Figure S4.** Cytotoxicity test. To assess cytotoxicity of MNPs for target cells, cell viability (%) was determined after incubating SKBR-3 cells with MNPs at various concentrations (0, 25, 50, 100 and 200  $\mu\text{g/mL}$ ) for 24 h.

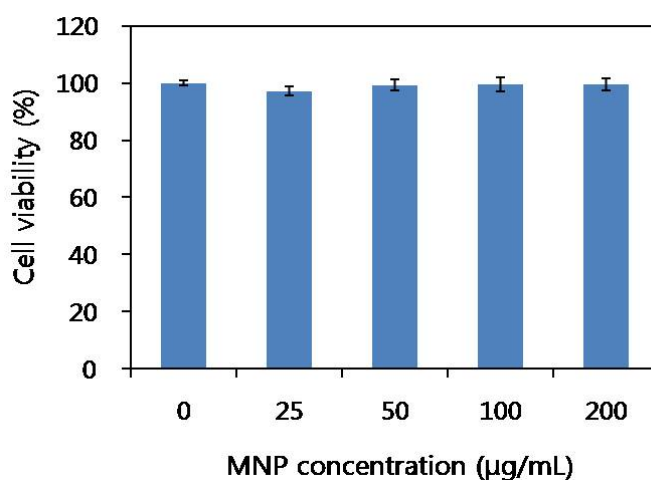

**Figure S5.** Calibration curve showing relationship between the numbers of SKBR-3 cells and the absorbance intensity at 650 nm generated from a direct immunoassay using MNP-HER2 antibody conjugates.

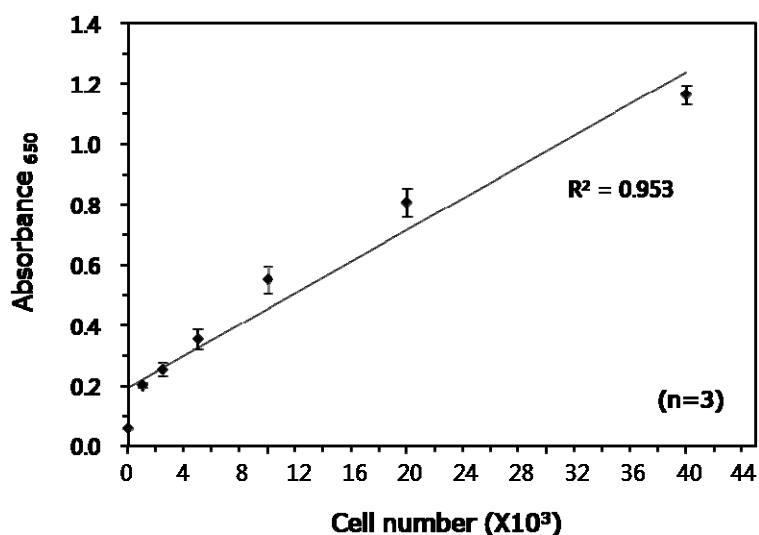

**Figure S6.** Magnetic resonance imaging (MRI). (A) Plot of each cell line versus R2 enhancement ( $\Delta R2/R2_{\text{control}}$ ) versus different cell lines treated with MNP-Abs; (B) T<sub>2</sub>-weighted MR images of each cell line treated with MNP-Abs.  $2 \times 10^6$  cells were seeded in each well of 6-well plate (SPL Lifescience, Pocheon, Korea) and grown for 24 h. The cells were then incubated with 100  $\mu\text{g/mL}$  of MNP-Abs diluted in fresh medium. After 2 h, the medium was removed, and the cells were thoroughly washed with PBS solution, then detached from the well using Trypsin/EDTA solution (Invitrogen, Carlsbad, CA, USA) and harvested by centrifugation at 9000 rpm for 3 min. The cells were resuspended in 1% paraformaldehyde in PBS solution, followed by incubation at 4 °C for 2 h. They were then washed with PBS solution and again harvested at 9000 rpm for 3 min. The cell pellet was suspended in 2% low melting agarose (Sigma-Aldrich, St. Louis, MO, USA), and solidified at room temperature and kept at 4 °C. T<sub>2</sub>-weighted MR imaging experiments were performed using a 4.7 T clinical MRI instrument (Bruker BioSpec 47/40). The parameters for T<sub>2</sub>-weighted MR images were as follows: TE = 15 ms, TR = 1000 ms for MNPs. R2 was defined as  $1/T_2$  in units of  $\text{s}^{-1}$ . As the concentration increased, the MRI signal intensity decreased due to a tendency of MNPs to shorten the spin-spin relaxation times (T<sub>2</sub>) of water, resulting in a decrease in the MRI signal intensity. The incubation of MNP-Abs with SKBR-3 cells resulted in a significantly high enhancement in R2 ( $\Delta R2/R2_{\text{control}}$ ) (~85%) and correspondingly consistent MR contrast.

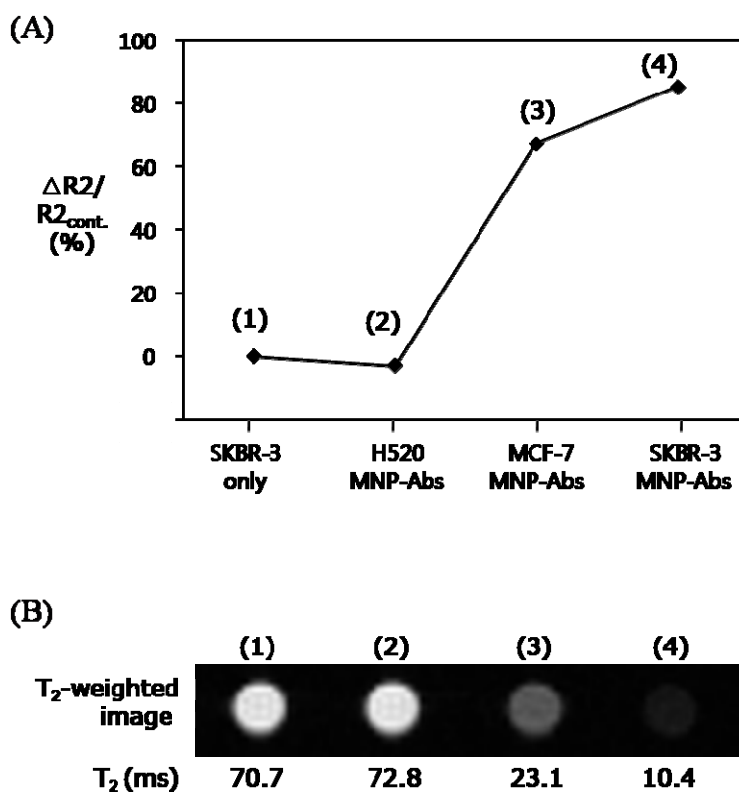

Supplement: ijms-14-09999-s001.pdf [file ijms-14-09999-s001.pdf]
